# Supplementary material for: Overexpression of MsDREB1C Modulates Growth and Improves Forage Quality in Tetraploid Alfalfa (Medicago sativa L.)
Source: MDPI journal article supplement (doi:10.3390/plants13091237), 2024-04-29
Supplement: s1 [file s1]

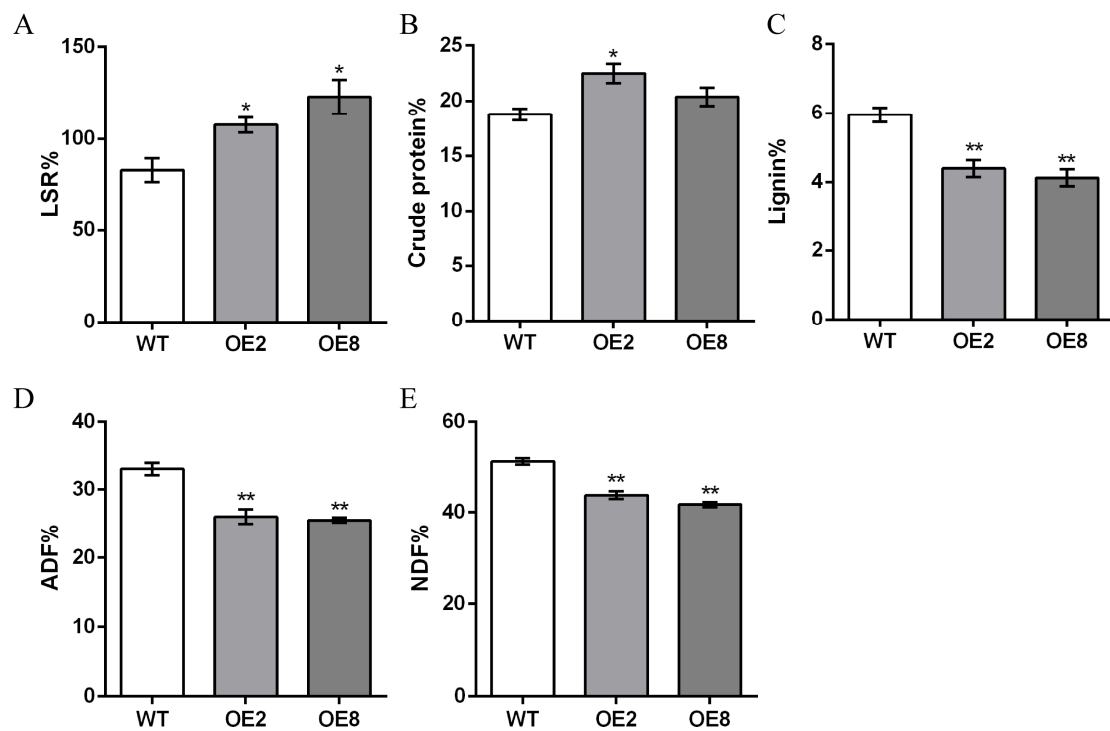

**Figure S1** Determination of forage quality of alfalfa after second clipping. Leaf-stem ratio (LSR) (A), % crude protein (B), % lignin (C), % acid detergent fiber (ADF) (D), % neutral detergent fiber (NDF) (E) in both WT and transgenic plants (OE2, OE8). “\*” represents  $p < 0.05$ , “\*\*” represents  $p < 0.01$ . Note: The results were analyzed using a one-way ANOVA test. Data are means  $\pm$  SEM of three biological replicates.

**Table S1** The physical positions of 5 DREB genes on chromosome

| Gene Name         | Chromosome | Start position | Stop position | Direction on the |
|-------------------|------------|----------------|---------------|------------------|
| <i>Msa0891950</i> | Chr6       | 69234712       | 69239739      | Forward          |
| <i>Msa0891960</i> | Chr6       | 69344692       | 69345384      | Forward          |
| <i>Msa0891970</i> | Chr6       | 69357058       | 69357738      | Forward          |
| <i>Msa0891980</i> | Chr6       | 69374816       | 69375502      | Forward          |
| <i>Msa0891990</i> | Chr6       | 69523664       | 69525980      | Forward          |

**Table S2** Comparison of growth-related indicators in *MsDREB1C*-overexpressing and wild type alfalfa

|     | Environment I |         |        | Environment II |         |         |
|-----|---------------|---------|--------|----------------|---------|---------|
|     | MNN           | AIL(cm) | DFR    | MNN            | AIL(cm) | DFR     |
| WT  | 8.5           | 3.1     | 0.31   | 5.3            | 2.4     | 0.21    |
| OE2 | 7.1 *         | 2.6 *   | 0.28 * | 5.3            | 1.7 *   | 0.19    |
| OE8 | 7.6           | 2.8     | 0.27 * | 6              | 1.6 *   | 0.23 ** |

Note: "MNN" represents numbers of node on main stem. "AIL" represents average internode length of main stem (Height / MNN). "DFR" represents the ratio of dry weight to fresh weight. All indicators are measured after 30 days of plant growth.

'Environment I' represents the conditions in the growth chamber (24 °C/22 °C, 16 h/8 h daytime/nighttime cycles), that is, long-day conditions. 'Environment II' represents outdoor autumn conditions in Haidian district, Beijing, namely short-day conditions.

Among them, the alfalfa grown in 'environment I' was hydroponic, and the alfalfa grown in 'environment II' was soil-cultured in pots. The growth height of alfalfa grown in two environments was measured from September 19 to October 19. Note:

The results were analyzed using a one-way ANOVA test. "\*" represents  $p < 0.05$ , "\*\*" represents  $p < 0.01$ .

**Table S3** Primers sets used in this study

| Primer          | Sequence (5'-3')                                |
|-----------------|-------------------------------------------------|
| Ms0891950-RT-F  | GGAACAAAGACATATGTGTCAGGA                        |
| Ms0891950-RT-R  | AGTTGAGACAGGCGTAACGG                            |
| Ms0891960-RT-F  | GTAGGACTTGTATGGAAGAGGAA                         |
| Ms0891960-RT-R  | ACCTCTTCATCTTGAAAATCTGGA                        |
| Ms0891970-RT-F  | GGCTATTGCCACTACGGAGG                            |
| Ms0891970-RT-R  | TGTGTAGGAGACATTAGCGCC                           |
| Ms0891980-RT-F  | CTAGGCACTTTTCCGACAGC                            |
| Ms0891980-RT-R  | GTCTTGTCCGGTCTGAAAGC                            |
| Ms0891990-RT-F  | CGACTATAGCCGCCTCTACC                            |
| Ms0891990-RT-R  | TGGCATGTTTCATCGATCCCT                           |
| MsDREB1C-F      | ATGGATATGTTAACAACAACTC                          |
| MsDREB1C-R      | TTAATAATTCCATAGTGATACCTCTTC                     |
| MsDREB1C-1300-F | TCTAGAAAGCTTCTGCAGGGGATGGATATGTTAACAACAA<br>CTC |
| MsDREB1C-1300-R | CTCCTCGCCCTTGCTCACCATAAATTCCATAGTGATACCTCTTC    |
| 1300-F          | ACAACGCTTTACAGCAAGAACGG                         |
| 1300-R          | GGTCAGGGTGGTCACGAGGG                            |
| MsDREB1C-BD-F   | CATGGAGGCCGAATTCATGGATATGTTAACAACAA CAAC        |
| MsDREB1C-BD-R   | GCAGGTCGACGGATCCTTAATAATTCCATAGTGATA CCTC       |
| MsActin-F       | CAAAAGATGGCAGATGCTGAGGAT                        |

|               |                          |
|---------------|--------------------------|
| MsActin-R     | CATGACACCAGTATGACGAGGTCG |
| MsDREB1C-RT-F | CTAGGCACTTTTCCGACAGC     |
| MsDREB1C-RT-R | GTCTTGTCCGGTCTGAAAGC     |
| MsNST-RT-F    | TGGCTTGCTTTAATGACCCC     |
| MsNST-RT-R    | TCGAGCAAAGTTCCAGAGGT     |
| MsPAL1-RT-F   | CGGGTTTGTTAACCGGCAGA     |
| MsPAL1-RT-R   | ACTTCAGCGAAAATTGCCGAC    |
| MsC4H-RT-F    | GAAGTCCTCCACACACAAGGT    |
| MsC4H-RT-R    | CAACACTCGCTTCAGCGTT      |
| Ms4CL-RT-F    | CCCGAGTTCCACTCACTCAC     |
| Ms4CL-RT-R    | CTGTCAGCAAACAAACCGCA     |
| MsGA20ox-RT-F | GAATGAGCCTTGGAGTTGG      |
| MsGA20ox-RT-R | TGGAATGCCATTGATCGTC      |
| MsGA20ox-RT-F | TCCCCTGCTTTTGGTAAAGAT    |
| MsGA20ox-RT-R | GGACAAGGGGGATAATGGTTG    |

---
